# Supplementary material
Source: publisher site journal article supplement (http://www.kjim.org/upload/media/kjim-2023-098-Supplementary-Table-2.pdf)
Supplement: Supplementary file 1 [file kjim-2023-098-Supplementary-Table-2.pdf]

**Supplementary Table 2. Evidence profile for bleeding-related prognostic factors**

| No. of studies                                                                 | Certainty assessment domains |              |             |              |             |                  | Overall certainty in the evidence about this prognostic factor | Relative effect, OR (95% CI)                              |
|--------------------------------------------------------------------------------|------------------------------|--------------|-------------|--------------|-------------|------------------|----------------------------------------------------------------|-----------------------------------------------------------|
|                                                                                | Study design                 | Risk of bias | Indirect    | Inconsistent | Imprecise   | Publication bias |                                                                |                                                           |
| History of peptic ulcer/GIB (yes vs. no) [19,23,24,28,30,39,41,45,47,48,50-52] |                              |              |             |              |             |                  |                                                                |                                                           |
| 13                                                                             | Observational                | Serious      | Not serious | Serious      | Not serious | Serious          | ⊕⊙⊙⊙<br>VERY LOW                                               | 5.26 (2.76–10.05)                                         |
| Concomitant therapy with clopidogrel (yes vs. no) [19]                         |                              |              |             |              |             |                  |                                                                |                                                           |
| 1                                                                              | Observational                | Serious      | Not serious | Not serious  | Serious     | Undetected       | ⊕⊕⊙⊙<br>LOW                                                    | 2.37 (1–5.65)                                             |
| HasBled-Score (≥ 3 vs. < 3) [19,41]                                            |                              |              |             |              |             |                  |                                                                |                                                           |
| 2                                                                              | Observational                | Serious      | Not serious | Serious      | Serious     | Undetected       | ⊕⊙⊙⊙<br>VERY LOW                                               | 1.20 (0.06–22.63)                                         |
| Older age (yes vs. no) [19,23,24,28,33,36,45,47]                               |                              |              |             |              |             |                  |                                                                |                                                           |
| 8                                                                              | Observational                | Serious      | Not serious | Not serious  | Not serious | Undetected       | ⊕⊕⊕⊙<br>MODERATE                                               | 1.95 (1.36–2.79)                                          |
| Age: for each 1-year increase (yes vs. no) [40,51]                             |                              |              |             |              |             |                  |                                                                |                                                           |
| 2                                                                              | Observational                | Serious      | Not serious | Not serious  | Not serious | Undetected       | ⊕⊕⊕⊙<br>MODERATE                                               | 1.03 (1.01–1.06)                                          |
| Age: for each 5-year increase (yes vs. no) [50]                                |                              |              |             |              |             |                  |                                                                |                                                           |
| 1                                                                              | Observational                | Serious      | Not serious | Not serious  | Serious     | Undetected       | ⊕⊕⊙⊙<br>LOW                                                    | 1.11 (1.06–1.17)                                          |
| Kidney disease (yes vs. no) [19,36,45,46,52]                                   |                              |              |             |              |             |                  |                                                                |                                                           |
| 5                                                                              | Observational                | Serious      | Not serious | Not serious  | Not serious | Undetected       | ⊕⊕⊕⊙<br>MODERATE                                               | 1.69 (1.24–2.31)                                          |
| Combination of corticosteroid (yes vs. no) [19,41]                             |                              |              |             |              |             |                  |                                                                |                                                           |
| 2                                                                              | Observational                | Serious      | Not serious | Not serious  | Serious     | Undetected       | ⊕⊕⊙⊙<br>LOW                                                    | 2.14 (0.98–4.72)                                          |
| Dabigatran dose (dabigatran 150 mg twice daily vs. warfarin) [21,35]           |                              |              |             |              |             |                  |                                                                |                                                           |
| 2                                                                              | Observational                | Serious      | Not serious | Serious      | Not serious | Undetected       | ⊕⊕⊙⊙<br>LOW                                                    | 1.53 (1.39–1.69)                                          |
| Concomitant use of aspirin (yes vs. no) [22,23,26,27,47]                       |                              |              |             |              |             |                  |                                                                |                                                           |
| 5                                                                              | Observational                | Serious      | Not serious | Not serious  | Not serious | Undetected       | ⊕⊕⊕⊙<br>MODERATE                                               | 2.07 (1.17–3.66)                                          |
| INR (> 2.1 vs. ≤ 2.1; ≥ 4 vs. < 4) [24,41]                                     |                              |              |             |              |             |                  |                                                                |                                                           |
| 2                                                                              | Observational                | Serious      | Not serious | Not serious  | Not serious | Undetected       | ⊕⊕⊕⊙<br>MODERATE                                               | INR > 2.1: 2.05 (1.00–4.20)<br>INR < 4: 4.09 (1.17–14.27) |
| Cirrhosis (yes vs. no) [24,52]                                                 |                              |              |             |              |             |                  |                                                                |                                                           |
| 2                                                                              | Observational                | Serious      | Not serious | Not serious  | Not serious | Undetected       | ⊕⊕⊕⊙<br>MODERATE                                               | 6.24 (2.63–14.83)                                         |
| Obesity (weight > 120 vs. ≤ 120 kg) [25]                                       |                              |              |             |              |             |                  |                                                                |                                                           |
| 1                                                                              | Observational                | Serious      | Not serious | Not serious  | Not serious | Undetected       | ⊕⊕⊕⊙<br>MODERATE                                               | 1.44 (1.01–2.05)                                          |
| Alcohol use (yes vs. no) [26,36]                                               |                              |              |             |              |             |                  |                                                                |                                                           |
| 2                                                                              | Observational                | Serious      | Not serious | Not serious  | Not serious | Undetected       | ⊕⊕⊕⊙<br>MODERATE                                               | 3.46 (2.30–5.19)                                          |

**Supplementary Table 2. Continued**

| No. of studies                                                                             | Certainty assessment domains |              |             |              |             |                  | Overall certainty in the evidence about this prognostic factor | Relative effect, OR (95% CI)                                                                               |
|--------------------------------------------------------------------------------------------|------------------------------|--------------|-------------|--------------|-------------|------------------|----------------------------------------------------------------|------------------------------------------------------------------------------------------------------------|
|                                                                                            | Study design                 | Risk of bias | Indirect    | Inconsistent | Imprecise   | Publication bias |                                                                |                                                                                                            |
| Smoking (yes vs. no) [26,50]                                                               |                              |              |             |              |             |                  |                                                                |                                                                                                            |
| 2                                                                                          | Observational                | Serious      | Not serious | Not serious  | Not serious | Undetected       | ⊕⊕⊕⊖<br>MODERATE                                               | 1.26 (1.18–1.35)                                                                                           |
| Liver failure (yes vs. no) [26]                                                            |                              |              |             |              |             |                  |                                                                |                                                                                                            |
| 1                                                                                          | Observational                | Serious      | Not serious | Not serious  | Not serious | Undetected       | ⊕⊕⊕⊖<br>MODERATE                                               | 7.01 (4.78–10.27)                                                                                          |
| Concomitant with NSAIDs: including paracetamol, COX-2 inhibitor (yes vs. no) [26,39,43,47] |                              |              |             |              |             |                  |                                                                |                                                                                                            |
| 4                                                                                          | Observational                | Serious      | Not serious | Not serious  | Not serious | Undetected       | ⊕⊕⊕⊖<br>MODERATE                                               | NSAIDs use: 2.37 (1.61–3.50)<br>Paracetamol use: 1.47 (1.35–1.60)<br>COX-2 inhibitor use: 1.97 (1.59–2.40) |
| Antiplatelet agent use (yes vs. no) [19,27,36,39,42,47,48,50,51]                           |                              |              |             |              |             |                  |                                                                |                                                                                                            |
| 9                                                                                          | Observational                | Serious      | Not serious | Not serious  | Not serious | Undetected       | ⊕⊕⊕⊖<br>MODERATE                                               | 1.45 (1.11–1.90)                                                                                           |
| HF (congestive HF vs. no congestive HF; chronic HF vs. no chronic HF) [28,36,46]           |                              |              |             |              |             |                  |                                                                |                                                                                                            |
| 3                                                                                          | Observational                | Serious      | Not serious | Not serious  | Not serious | Undetected       | ⊕⊕⊕⊖<br>MODERATE                                               | Any HF: 1.30 (1.14–1.49)<br>Chronic HF: 1.31 (1.09–1.58)<br>Congestive HF: 1.29 (1.06–1.57)                |
| History of bleeding (yes vs. no) [28]                                                      |                              |              |             |              |             |                  |                                                                |                                                                                                            |
| 1                                                                                          | Observational                | Serious      | Not serious | Not serious  | Not serious | Undetected       | ⊕⊕⊕⊖<br>MODERATE                                               | History of bleeding: 3.26 (1.86–5.73)                                                                      |
| Sex (male vs. female) [20,26,28,36,39,40,47]                                               |                              |              |             |              |             |                  |                                                                |                                                                                                            |
| 2                                                                                          | Observational                | Serious      | Not serious | Serious      | Not serious | Undetected       | ⊕⊕⊖⊖<br>LOW                                                    | 0.95 (0.72–1.26)                                                                                           |
| Myocardial infarction (yes vs. no) [28]                                                    |                              |              |             |              |             |                  |                                                                |                                                                                                            |
| 1                                                                                          | Observational                | Serious      | Not serious | Not serious  | Not serious | Undetected       | ⊕⊕⊕⊖<br>MODERATE                                               | 2.23 (1.12–4.43)                                                                                           |
| Peripheral vascular disease: including peripheral artery disease (yes vs. no) [28,36]      |                              |              |             |              |             |                  |                                                                |                                                                                                            |
| 2                                                                                          | Observational                | Serious      | Not serious | Not serious  | Serious     | Undetected       | ⊕⊕⊖⊖<br>LOW                                                    | 2.33 (0.66–8.20)                                                                                           |
| Concomitant use of dronedarone (yes vs. no) [29]                                           |                              |              |             |              |             |                  |                                                                |                                                                                                            |
| 1                                                                                          | Observational                | Serious      | Not serious | Not serious  | Not serious | Undetected       | ⊕⊕⊕⊖<br>MODERATE                                               | 1.29 (1.04–1.62)                                                                                           |
| Combination of CYP3A4 and/or P-gp-inhibitors (yes vs. no) [31]                             |                              |              |             |              |             |                  |                                                                |                                                                                                            |
| 1                                                                                          | Observational                | Serious      | Not serious | Not serious  | Not serious | Undetected       | ⊕⊕⊕⊖<br>MODERATE                                               | 1.47 (1.15–1.88)                                                                                           |
| Oral glucocorticoid use (yes vs. no) [32]                                                  |                              |              |             |              |             |                  |                                                                |                                                                                                            |
| 1                                                                                          | Observational                | Serious      | Not serious | Serious      | Not serious | Undetected       | ⊕⊕⊖⊖<br>LOW                                                    | 1.83 (1.30–2.59)                                                                                           |

Supplementary Table 2. Continued

| No. of studies                                                                                                                                                                                                         | Certainty assessment domains |              |             |              |             |                  | Overall certainty in the evidence about this prognostic factor | Relative effect, OR (95% CI)                                                                                                                        |
|------------------------------------------------------------------------------------------------------------------------------------------------------------------------------------------------------------------------|------------------------------|--------------|-------------|--------------|-------------|------------------|----------------------------------------------------------------|-----------------------------------------------------------------------------------------------------------------------------------------------------|
|                                                                                                                                                                                                                        | Study design                 | Risk of bias | Indirect    | Inconsistent | Imprecise   | Publication bias |                                                                |                                                                                                                                                     |
| Renal failure (yes vs. no) [34,47]                                                                                                                                                                                     |                              |              |             |              |             |                  |                                                                |                                                                                                                                                     |
| 2                                                                                                                                                                                                                      | Observational                | Serious      | Not serious | Not serious  | Not serious | Undetected       | ⊕⊕⊕○<br>MODERATE                                               | Total: 3.18 (1.44–6.99)<br>GFR 50–80 mL/min/1.73 m <sup>2</sup> :<br>2.95 (1.24–7.02)<br>GFR ≤ 30 mL/min/1.73 m <sup>2</sup> :<br>4.53 (0.68–30.14) |
| Coronary artery disease (yes vs. no) [36]                                                                                                                                                                              |                              |              |             |              |             |                  |                                                                |                                                                                                                                                     |
| 1                                                                                                                                                                                                                      | Observational                | Serious      | Not serious | Not serious  | Not serious | Undetected       | ⊕⊕⊕○<br>MODERATE                                               | 1.36 (1.10–1.69)                                                                                                                                    |
| <i>Helicobacter pylori</i> infection (yes vs. no) [36]                                                                                                                                                                 |                              |              |             |              |             |                  |                                                                |                                                                                                                                                     |
| 1                                                                                                                                                                                                                      | Observational                | Serious      | Not serious | Not serious  | Not serious | Undetected       | ⊕⊕⊕○<br>MODERATE                                               | 4.75 (1.93–11.68)                                                                                                                                   |
| Combination of digoxin (yes vs. no) [36]                                                                                                                                                                               |                              |              |             |              |             |                  |                                                                |                                                                                                                                                     |
| 1                                                                                                                                                                                                                      | Observational                | Serious      | Not serious | Not serious  | Not serious | Undetected       | ⊕⊕⊕○<br>MODERATE                                               | 1.50 (1.19–1.88)                                                                                                                                    |
| Combination of gemfibrozil (yes vs. no) [38]                                                                                                                                                                           |                              |              |             |              |             |                  |                                                                |                                                                                                                                                     |
| 1                                                                                                                                                                                                                      | Observational                | Serious      | Not serious | Not serious  | Not serious | Undetected       | ⊕⊕⊕○<br>MODERATE                                               | 2.29 (1.61–3.25)                                                                                                                                    |
| Creatinine level (per 1 mg/dL increase) (yes vs. no) [40]                                                                                                                                                              |                              |              |             |              |             |                  |                                                                |                                                                                                                                                     |
| 1                                                                                                                                                                                                                      | Observational                | Serious      | Not serious | Not serious  | Not serious | Undetected       | ⊕⊕⊕○<br>MODERATE                                               | 1.38 (1.09–1.74)                                                                                                                                    |
| Creatinine clearance < 60 mL/min (yes vs. no) [50]                                                                                                                                                                     |                              |              |             |              |             |                  |                                                                |                                                                                                                                                     |
| 1                                                                                                                                                                                                                      | Observational                | Serious      | Not serious | Not serious  | Serious     | Undetected       | ⊕⊕○○<br>LOW                                                    | 1.06 (1.01–1.12)                                                                                                                                    |
| Combination of verapamil or diltiazem (yes vs. no) [44]                                                                                                                                                                |                              |              |             |              |             |                  |                                                                |                                                                                                                                                     |
| 1                                                                                                                                                                                                                      | Observational                | Serious      | Not serious | Not serious  | Not serious | Undetected       | ⊕⊕⊕○<br>MODERATE                                               | 2.33 (1.82–2.98)                                                                                                                                    |
| Mechanical valve implant (yes vs. no) [45]                                                                                                                                                                             |                              |              |             |              |             |                  |                                                                |                                                                                                                                                     |
| 1                                                                                                                                                                                                                      | Observational                | Serious      | Not serious | Not serious  | Serious     | Undetected       | ⊕⊕○○<br>LOW                                                    | 1.97 (0.43–9.07)                                                                                                                                    |
| Substance abuse: defined as alcohol dependence, drug dependence, or non-dependent abuse, excluding tobacco use disorder (presence vs. absence) [46]                                                                    |                              |              |             |              |             |                  |                                                                |                                                                                                                                                     |
| 1                                                                                                                                                                                                                      | Observational                | Serious      | Not serious | Not serious  | Not serious | Undetected       | ⊕⊕⊕○<br>MODERATE                                               | 1.41 (1.07–1.87)                                                                                                                                    |
| Psychiatric illness: defined as schizophrenia, affective psychosis, paranoia, or other nonorganic psychosis (presence vs. absence) [46]                                                                                |                              |              |             |              |             |                  |                                                                |                                                                                                                                                     |
| 1                                                                                                                                                                                                                      | Observational                | Serious      | Not serious | Not serious  | Not serious | Undetected       | ⊕⊕⊕○<br>MODERATE                                               | 1.20 (1.03–1.39)                                                                                                                                    |
| Social risk factors: defined as lack of housing, inadequate housing, inadequate material resources, persons living alone, no other household member able to render care, or non-compliance with medical treatment [46] |                              |              |             |              |             |                  |                                                                |                                                                                                                                                     |
| 1                                                                                                                                                                                                                      | Observational                | Serious      | Not serious | Not serious  | Not serious | Undetected       | ⊕⊕⊕○<br>MODERATE                                               | 1.29 (1.12–1.48)                                                                                                                                    |

**Supplementary Table 2. Continued**

| No. of studies                                                                   | Certainty assessment domains |              |             |              |             |                  | Overall certainty in the evidence about this prognostic factor | Relative effect, OR (95% CI) |
|----------------------------------------------------------------------------------|------------------------------|--------------|-------------|--------------|-------------|------------------|----------------------------------------------------------------|------------------------------|
|                                                                                  | Study design                 | Risk of bias | Indirect    | Inconsistent | Imprecise   | Publication bias |                                                                |                              |
| Liver disease (yes vs. no) [46]                                                  |                              |              |             |              |             |                  |                                                                |                              |
| 1                                                                                | Observational                | Serious      | Not serious | Not serious  | Serious     | Undetected       | ⊕⊕○○<br>LOW                                                    | 1.31 (0.99–1.74)             |
| Venous thromboembolism: including deep vein thrombosis (yes vs. no) [36,46]      |                              |              |             |              |             |                  |                                                                |                              |
| 2                                                                                | Observational                | Serious      | Not serious | Not serious  | Not serious | Undetected       | ⊕⊕⊕○<br>MODERATE                                               | 1.21 (1.02–1.44)             |
| Diabetes (yes vs. no) [36,46]                                                    |                              |              |             |              |             |                  |                                                                |                              |
| 2                                                                                | Observational                | Serious      | Not serious | Not serious  | Serious     | Undetected       | ⊕⊕○○<br>LOW                                                    | 1.08 (0.96–1.21)             |
| Anticoagulant treatment time (≤ 100 vs. > 100 d) [47-49]                         |                              |              |             |              |             |                  |                                                                |                              |
| 3                                                                                | Observational                | Serious      | Not serious | Not serious  | Not serious | Undetected       | ⊕⊕⊕○<br>MODERATE                                               | 4.94 (2.66–9.17)             |
| Combination of thienopyridines use (yes vs no) [47]                              |                              |              |             |              |             |                  |                                                                |                              |
| 1                                                                                | Observational                | Serious      | Not serious | Not serious  | Serious     | Undetected       | ⊕⊕○○<br>LOW                                                    | 2.37 (0.75–7.44)             |
| Long-term ASA use at screening (yes vs. no) [50]                                 |                              |              |             |              |             |                  |                                                                |                              |
| 1                                                                                | Observational                | Serious      | Not serious | Not serious  | Not serious | Undetected       | ⊕⊕⊕○<br>MODERATE                                               | 1.47 (1.26–1.72)             |
| Anemia (yes vs. no) [36,50]                                                      |                              |              |             |              |             |                  |                                                                |                              |
| 2                                                                                | Observational                | Serious      | Not serious | Not serious  | Not serious | Undetected       | ⊕⊕⊕○<br>MODERATE                                               | 1.48 (1.10–1.98)             |
| Diastolic BP (for each 5 mmHg decrease to < 80 mmHg) (presence vs. absence) [50] |                              |              |             |              |             |                  |                                                                |                              |
| 1                                                                                | Observational                | Serious      | Not serious | Not serious  | Not serious | Undetected       | ⊕⊕⊕○<br>MODERATE                                               | 1.10 (1.05–1.16)             |
| History of sleep apnea (presence vs. absence) [50]                               |                              |              |             |              |             |                  |                                                                |                              |
| 1                                                                                | Observational                | Serious      | Not serious | Not serious  | Not serious | Undetected       | ⊕⊕⊕○<br>MODERATE                                               | 1.60 (1.22–2.10)             |
| COPD (yes vs. no) [50,52]                                                        |                              |              |             |              |             |                  |                                                                |                              |
| 2                                                                                | Observational                | Serious      | Not serious | Not serious  | Serious     | Undetected       | ⊕⊕○○<br>LOW                                                    | 2.01 (0.69–5.83)             |

GRADE Working Group grades of evidence:

1. High certainty: we are very confident that the true effect lies close to that of the estimate of the effect.
2. Moderate certainty: we are moderately confident in the effect estimate: the true effect is likely to be close to the estimate of the effect, but there is a possibility that it is substantially different.
3. Low certainty: our confidence in the effect estimate is limited: the true effect may be substantially different from the estimate of the effect.
4. Very low certainty: we have very little confidence in the effect estimate: the true effect is likely to be substantially different from the estimate of effect.

Explanations:

1. Risk of bias: The retrospective enrollment of patients may have introduced classification bias, certainty in evidence was downgraded for risk of bias.
2. Certainty in evidence was downgraded for high heterogeneity.
3. Imprecise: Certainty in evidence was downgraded for imprecision, given that the 95% CI suggests that there may be no association.
